# Supplementary material for: Facile synthesis of high-efficiency magnetic graphitic carbon nitride adsorbents for the selective removal of hazardous anionic dyes in wastewater
Source: Royal Society of Chemistry journal article supplement (doi:10.1039/d2dt02320b), 2022-01-01
Supplement: d2dt02320b1.pdf [file d2dt02320b1.pdf]

1 **Facile synthesis of high-efficiency magnetic graphitic carbon nitride adsorbents**  
2 **for selective removal of hazardous anionic dyes in wastewater**

3 Anwen Li, Yongyao Qiao, Xu Jiang, Min Zhao\*, Longshan Zhao\*

4 School of Pharmacy, Shenyang Pharmaceutical University, 103 Wenhua Road Shenhe  
5 District, Shenyang, Liaoning 110016, P. R. China.

6 \*Corresponding author: Professor Longshan Zhao, Associate Professor Min Zhao,  
7 School of Pharmacy, Shenyang Pharmaceutical University, 103 Wenhua Road Shenhe  
8 District, 110016, Shenyang, Liaoning Province, P. R. China.

9 E-mail: longshanzhao@163.com; zm19871224@sina.com

10 Tel. /Fax: 86-2443520571

## 11 **Chemical reagents**

12 All solutions were prepared with ultrapure water. g-C<sub>3</sub>N<sub>4</sub> was purchased from  
13 Beike Nano (Suzhou, China). Branched polyethyleneimine (PEI, MW: 600, content:  
14 99%) was supplied by the Macklin Chemical Reagents Co., Ltd(Shanghai, China)  
15 Congo red was purchased from Damao Chemical Reagent Co., Ltd (Tianjin, China).  
16 Other materials used were analytical grade in this study.

## 17 **Characterization**

18 Fourier transform infrared spectroscopy (FT-IR) was recorded on a Nicolet iS50  
19 Fourier transform infrared spectrophotometer (Thermo Scientific Co., USA) in the  
20 range of 400–4000 cm<sup>-1</sup>. Scanning electron microscopy (SEM) was used to  
21 characterize the microstructure of the sample using a FEI Nova Nano SEM 450  
22 (JEOL Co., Japan) and Transmission Electron Microscope (TEM) was obtained on a  
23 JEM-2100F electron micro scope (JEOL Co., Japan). Vibrating sample magnetometer  
24 (VSM) analysis of the synthesized materials was carried out with Lake Shore 7407  
25 (Lake Shore, USA) at room temperature. X-ray Photo Spectroscopy (XPS) analysis  
26 was carried out by using a Thermo Fisher ESCALAB 250Xi (Thermo Scientific Co.,  
27 USA) to confirm the chemical compositions. X-ray Diffraction (XRD) measurements  
28 over 2θ range from 20 to 70° were carried out at room temperature by using a D8  
29 Advance X-ray diffractometer (Bruker, Germany). The surface area and the pore size  
30 of the samples were obtained with N<sub>2</sub> adsorption/desorption isotherms at 77.3K using  
31 the ASAP2460 analyzer instrument (Micromeritics Instrument Corp, USA).

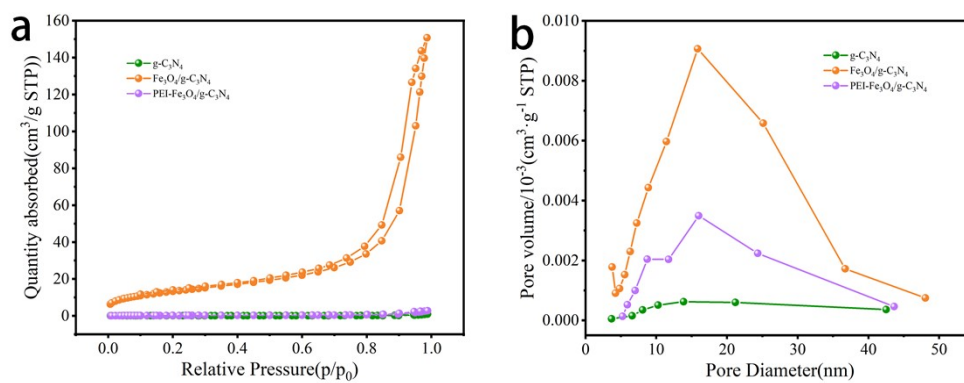

32

33 Fig.S1. (a)  $N_2$  adsorption/desorption isotherm (b) BJH pore size distribution

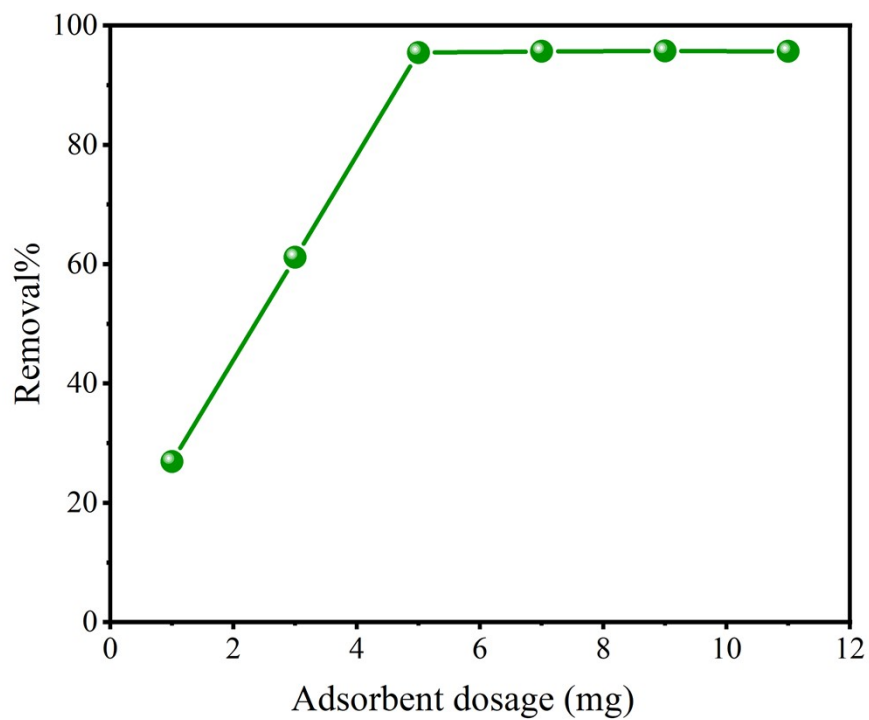

34

35

Fig.S2. The effect of adsorption dosage..
